# Supplementary material for: Regulation of CXCR4 function by S1P1 through heteromerization
Source: Springer Nature journal article supplement (doi:10.1186/s12964-025-02099-x), 2025-02-26
Supplement: MOESM1 [file 12964_2025_2099_MOESM1_ESM.pdf]

# **SUPPLEMENTARY INFORMATION**

## **Regulation of CXCR4 function by S1P<sub>1</sub> through heteromerization**

**Hyun-Tae Kim<sup>1</sup>, Jae-Yeon Jeong<sup>2\*</sup>, Won-Ki Huh<sup>1,2,3\*</sup>**

<sup>1</sup>School of Biological Sciences, Seoul National University, Seoul 08826, Republic of Korea

<sup>2</sup>GPCR Therapeutics Inc., Gwanak-gu, Seoul 08790, Republic of Korea

<sup>3</sup>Institute of Microbiology, Seoul National University, Seoul 08826, Republic of Korea

\*Correspondence:

Jae-Yeon Jeong

[jeongjy@gpcr.co.kr](mailto:jeongjy@gpcr.co.kr) (J.Y.J.)

Won-Ki Huh

[wkh@snu.ac.kr](mailto:wkh@snu.ac.kr) (W.K.H.)

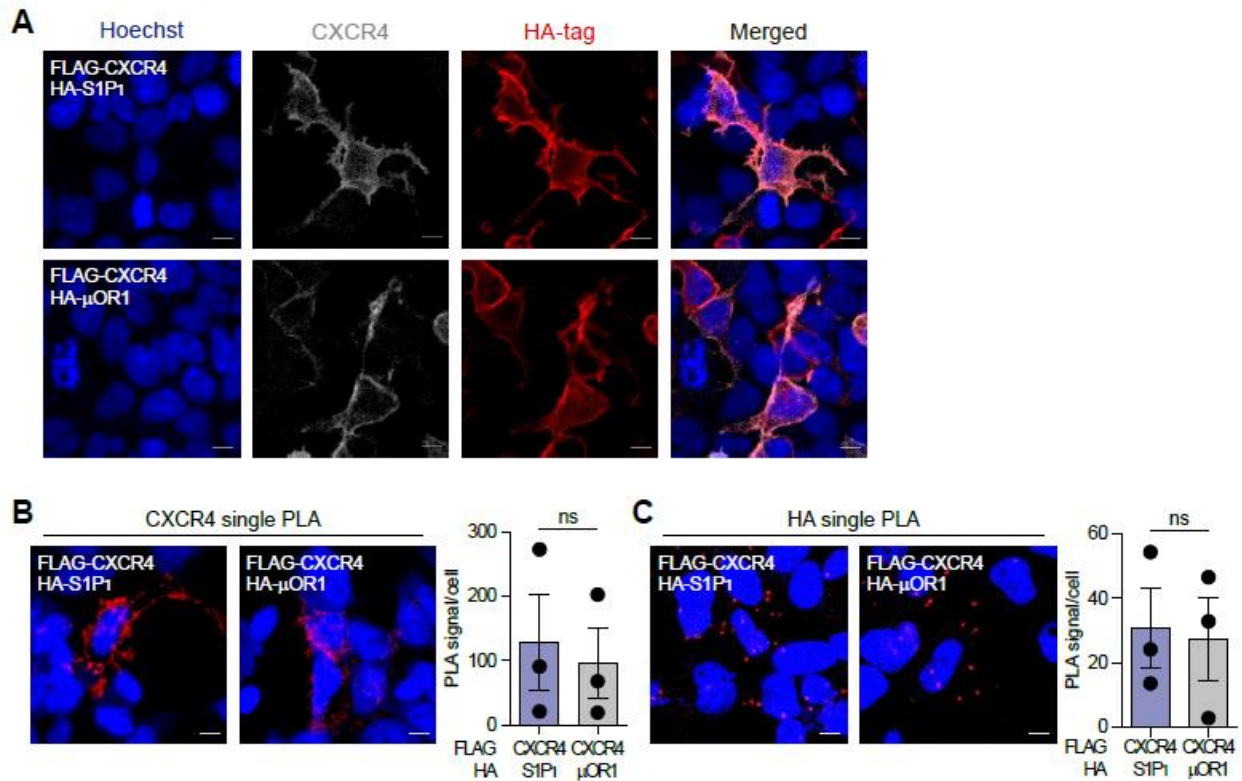

**Supplementary Figure 1.** Immunocytochemistry and single PLA of CXCR4, S1P<sub>1</sub>, and μOR1 in HEK293A cells.

(A) Expression of Flag-CXCR4, HA-S1P<sub>1</sub>, and HA-μOR1 was assessed using immunocytochemistry following permeabilization with 0.1% Triton X-100 for 15 min. Cells were stained with anti-CXCR4 (4G10) and anti-HA-tag (C29F4) antibodies to visualize protein localization. Cells were visualized using Hoechst 33342 (blue) for nuclei, AF647 (gray) for CXCR4, and AF568 (red) for HA-tagged GPCRs (S1P<sub>1</sub> and μOR1). Scale bars: 10 μm.

(B, C) Single PLA was performed under non-permeabilized conditions to detect homomer formation of CXCR4 (B) or HA-tagged S1P<sub>1</sub> or μOR1 (C) on the surface using anti-CXCR4 (4G10) and anti-HA-tag (C29F4) antibodies. PLA signals were shown in red and cells were visualized using Hoechst 33342 (blue) for nuclei. Images are representative of three independent experiments. Data represent the mean ± SEM of n = 3 independent experiments. Statistical significance was tested using two-tailed Student's *t*-test (B, C). ns, not significant. Scale bars: 10 μm.

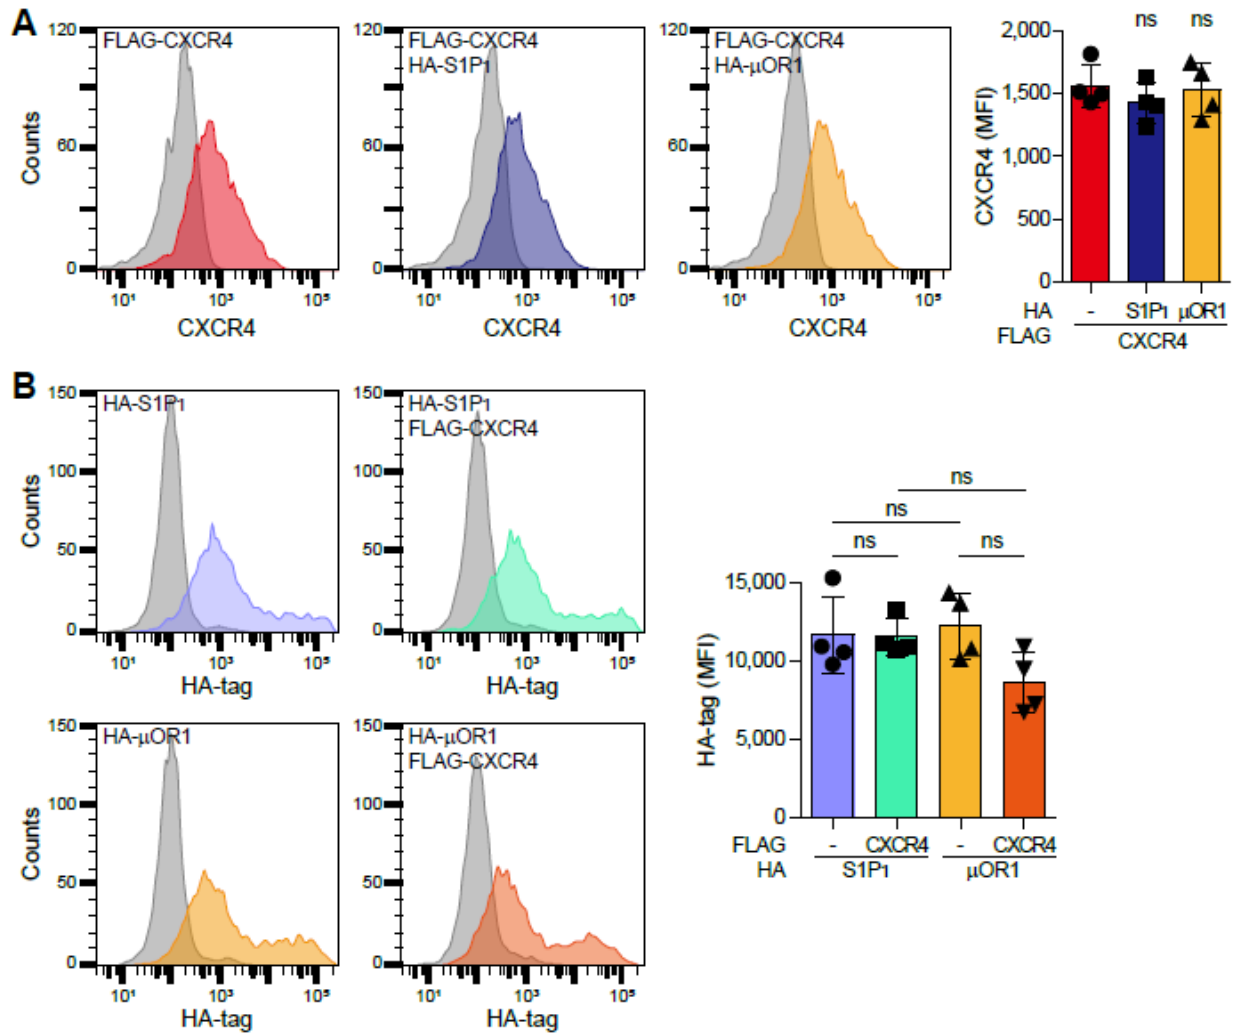

**Supplementary Figure 2.** Effect of GPCR coexpression on surface expression of partner GPCRs. (A) Surface expression of CXCR4 was analyzed using flow cytometry in HEK293A cells. Anti-CXCR4 (Ulocuplumab) antibody was used to detect CXCR4 in cells expressing Flag-CXCR4 alone (red) or together with HA-S1P<sub>1</sub> (blue) or HA-μOR1 (yellow). (B) Surface expression of S1P<sub>1</sub> and μOR1 was analyzed using flow cytometry in HEK293A cells. Anti-HA-tag (C29F4) antibody was used to detect S1P<sub>1</sub> and μOR1 in cells expressing HA-S1P<sub>1</sub> alone (light blue) or together with CXCR4 (light green) or HA-μOR1 alone (yellow) or together with CXCR4 (orange). Gray histograms represented staining with IgG control antibody. Representative histograms of four independent experiments are shown. Data represent the mean ± SD of n = 4 independent experiments. Statistical significance was tested using one-way ANOVA followed by Dunnett's post-hoc test (A) and Tukey's post-hoc test (B) at the indicated conditions. ns, not significant.

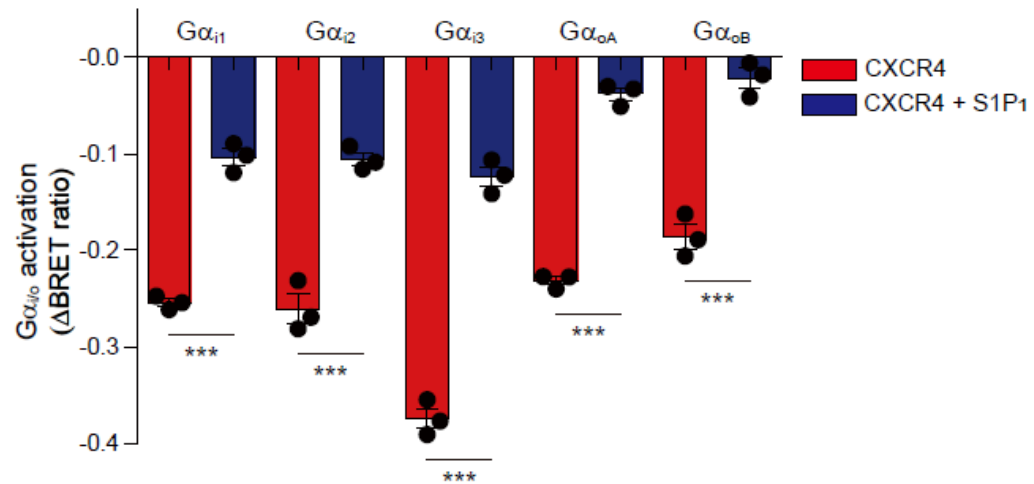

**Supplementary Figure 3.** Inhibition of CXCR4-mediated Gα<sub>i/o</sub> activation by S1P<sub>1</sub>. CXCL12 (10 nM)-induced G protein activation of five Gα<sub>i/o</sub> proteins was measured in HEK293A cells expressing CXCR4 alone or together with S1P<sub>1</sub>. Data represent the mean ± SEM of n = 3 independent experiments. Statistical significance was tested using two-tailed Student's *t*-test. \*\*\**P* < 0.001.

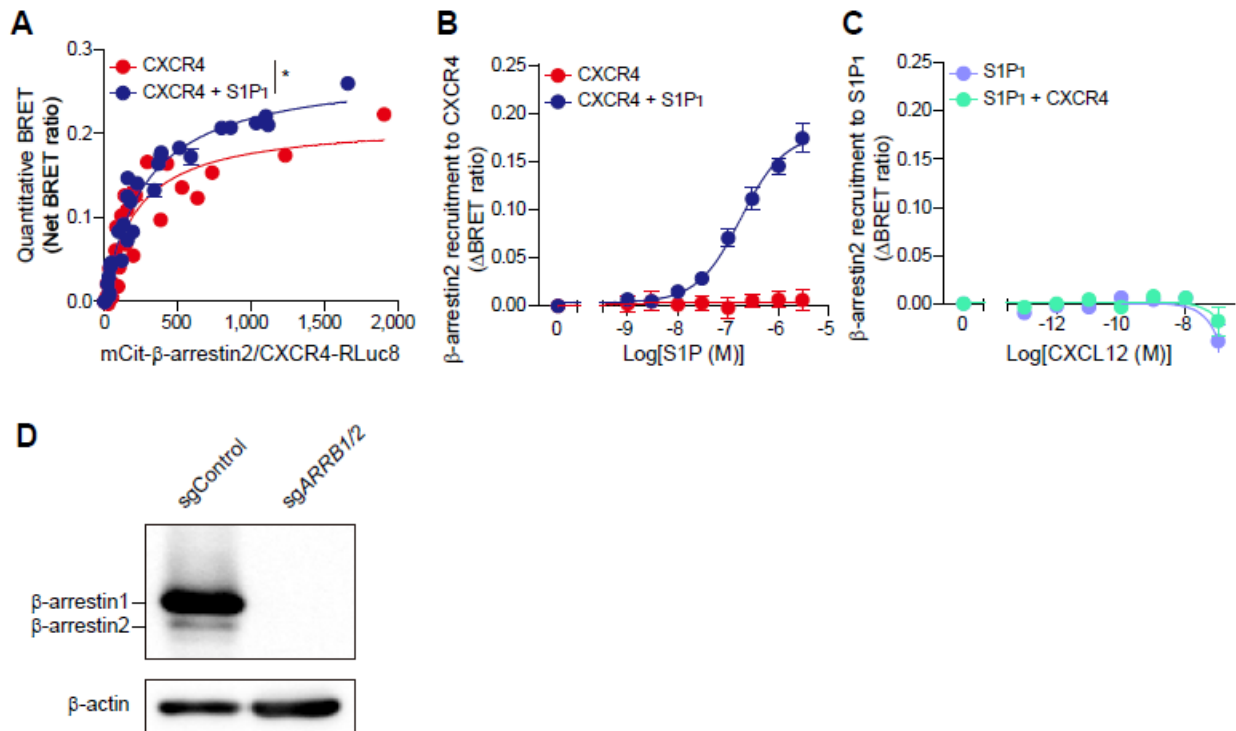

**Supplementary Figure 4.** CXCL12- or S1P-induced  $\beta$ -arrestin2 recruitment to CXCR4 or S1P<sub>1</sub> and validation of *ARRB1/2* knockout in HEK293A cells. **(A)** Quantitative BRET assay was performed in HEK293A cells between mCit-  $\beta$ -arrestin2 and CXCR4-RLuc8 in the absence or presence of S1P<sub>1</sub> and/or CXCL12 (10 nM). The curves were fitted using a non-linear regression equation and represent three independent experiments. **(B)** S1P-induced  $\beta$ -arrestin2 recruitment to CXCR4 was measured in HEK293A cells expressing CXCR4-RLuc8 alone or together with S1P<sub>1</sub>. **(C)** CXCL12-induced  $\beta$ -arrestin2 recruitment to S1P<sub>1</sub> was measured in HEK293A cells expressing S1P<sub>1</sub>-RLuc8 alone or together with CXCR4. **(D)** Western blotting was performed to validate deletion of  $\beta$ -arrestin1/2 in control and  $\beta$ -arrestin1/2-deficient HEK293A cells. Data represent the mean  $\pm$  SEM of  $n = 4$  independent experiments. Statistical significance was tested using two-tailed Student's  $t$ -test for BRET<sub>max</sub> (A). \* $P < 0.05$ .

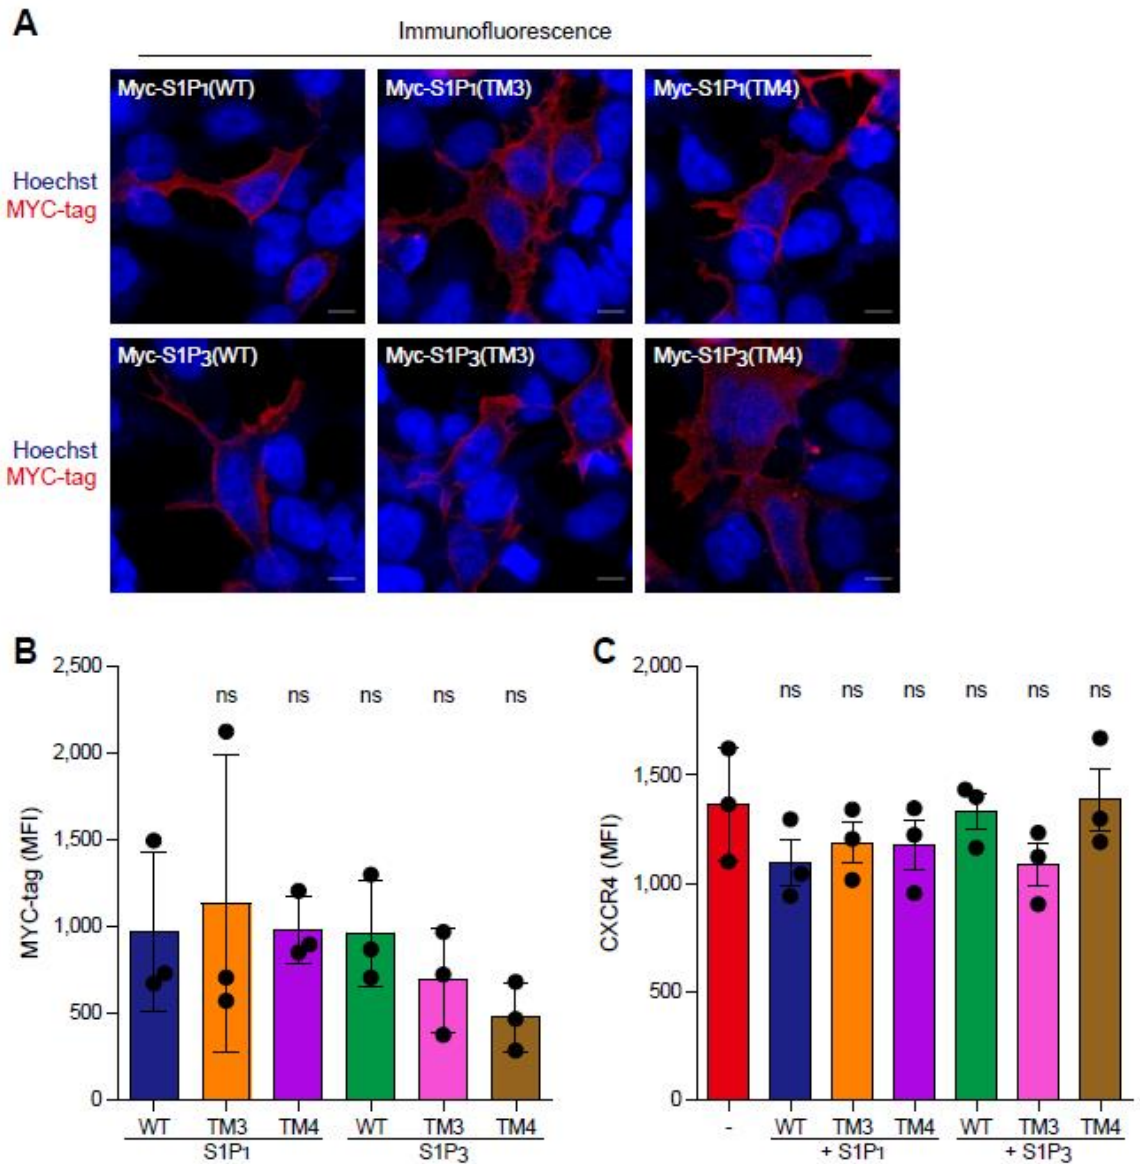

**Supplementary Figure 5.** Surface expression of domain-swapped S1P<sub>1</sub>/S1P<sub>3</sub> mutants and CXCR4 in HEK293A cells. **(A)** Expression of S1P<sub>1</sub>, S1P<sub>3</sub>, and their domain-swapped mutants was detected by immunocytochemistry using anti-MYC-tag (9B11) antibody. Cells were visualized using Hoechst 33342 (blue) for nuclei and AF647 (red) for MYC-tagged GPCRs. **(B)** Surface expression of MYC-tagged S1P<sub>1</sub>, S1P<sub>3</sub>, and their domain-swapped mutants was analyzed using flow cytometry in HEK293A cells transfected with equal amounts of plasmids encoding each GPCR. Anti-MYC-tag (9B11) antibody was used to detect MYC-tagged GPCRs. **(C)** Surface expression of CXCR4 was analyzed using flow cytometry in HEK293A cells transfected Flag-CXCR4 alone or together with S1P<sub>1</sub>, S1P<sub>3</sub>, and their domain-swapped mutants. Anti-CXCR4 (Ulocuplumab) antibody was used to detect CXCR4. Data represent the mean  $\pm$  SD of  $n = 3$  independent experiments. Statistical significance was tested using one-way ANOVA followed by Dunnett's post-hoc test. ns, not significant.

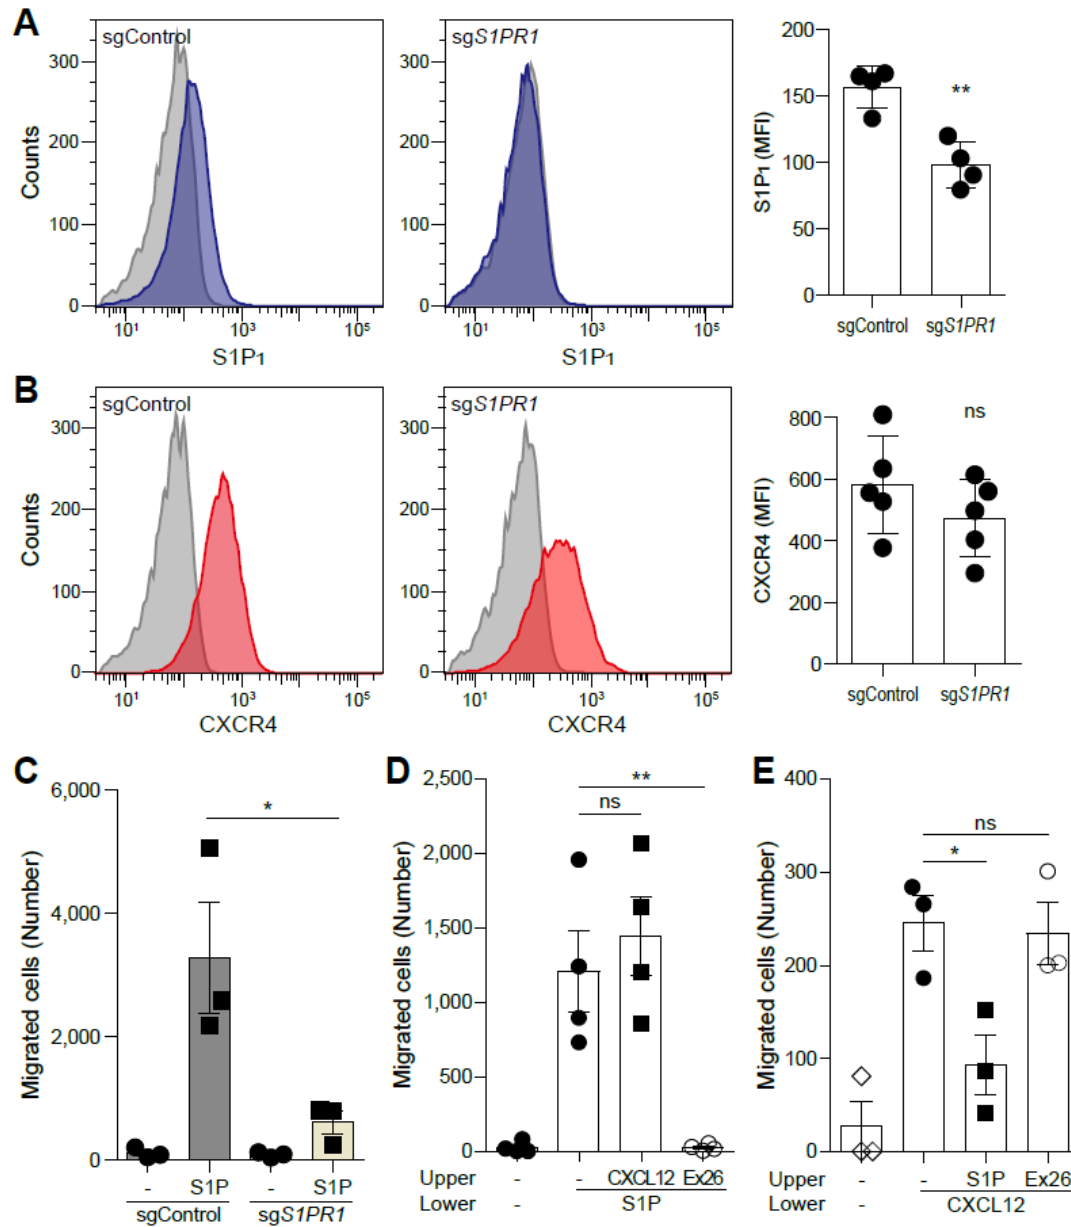

**Supplementary Figure 6.** Validation of *S1PR1* knockout in KARPAS299 cells and S1P-induced cell migration. (A, B) Surface expression of S1P<sub>1</sub> and CXCR4 was measured in control and S1P<sub>1</sub>-deficient KARPAS299 cells. Anti-S1P<sub>1</sub> (#218713) antibody was used to detect S1P<sub>1</sub> (A) and anti-CXCR4 (Ulocuplumab) antibody was used to detect CXCR4 (B). (C) Transwell migration assay was performed to measure S1P (10 nM)-induced migration of control and S1P<sub>1</sub>-deficient KARPAS299 cells. (D, E) Transwell migration assay was performed in KARPAS299 cells to measure the effects of CXCL12 (30 nM) and Ex26 (10 μM) on S1P (10 nM)-induced cell migration (D) and the effects of S1P (10 nM) and Ex26 (10 μM) on CXCL12 (30 nM)-induced cell migration (E). Gray histograms represent staining with IgG control antibody, and representative histograms of five independent experiments are shown (A, B). Data represent the mean ± SD of n = 4 to 5 independent experiments (A, B) and the mean ± SEM of n = 3 to 4 independent experiments (C-E). Statistical significance was tested using two-tailed Student's *t*-test (A-C) and one-way ANOVA followed by Dunnett's post-hoc test (D, E). \**P* < 0.05; \*\**P* < 0.01; ns, not significant.

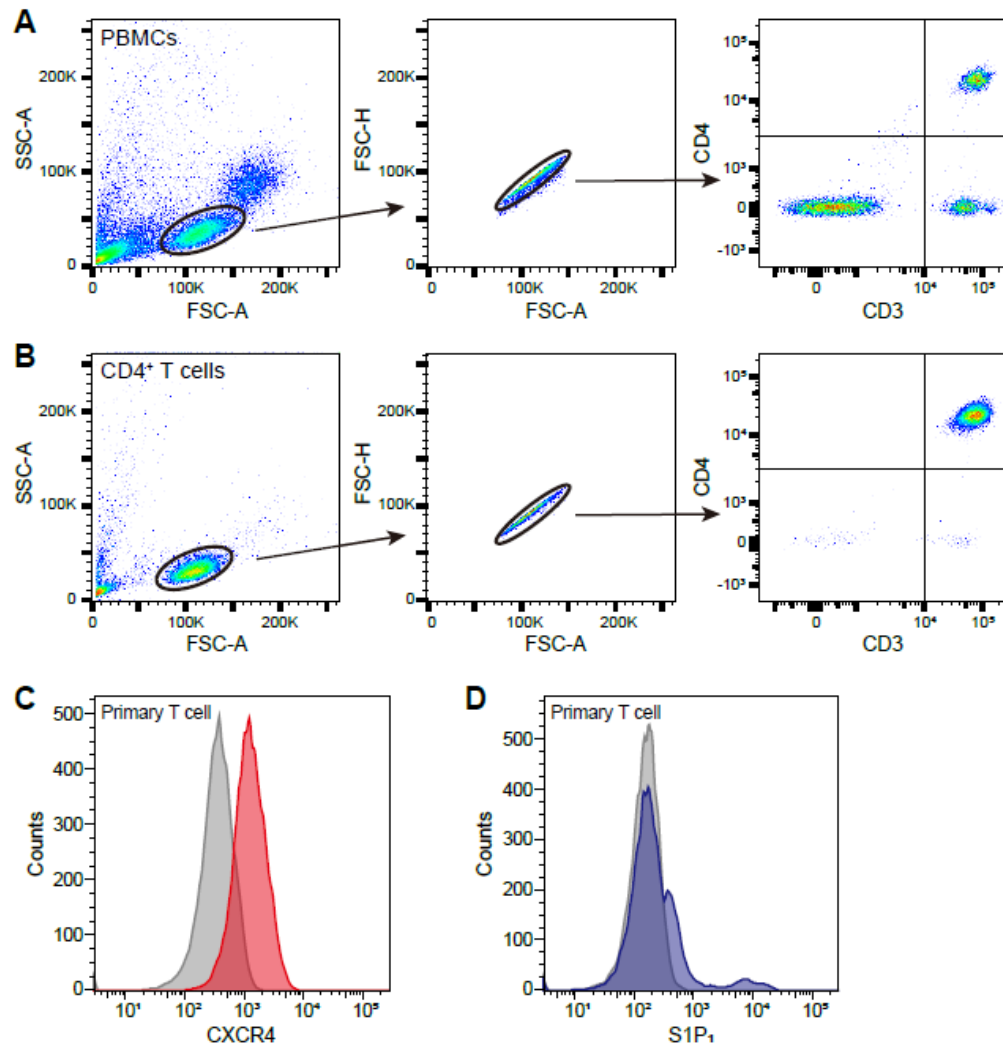

**Supplementary Figure 7.** Gating strategy and surface expression of CXCR4 and S1P<sub>1</sub> in primary T cells. (**A**, **B**) Gating strategy for PBMCs (**A**) and CD4<sup>+</sup> T cells (**B**). The population and expression characteristics of PBMCs and CD4<sup>+</sup> T cells were compared before (**A**) and after (**B**) isolation using anti-CD3 (UCHT1) and anti-CD4 (RPA-T4) antibodies. (**C**) Surface expression of CXCR4 was measured in primary T cells using anti-CXCR4 (4G10) antibody. (**D**) Surface expression of S1P<sub>1</sub> was measured in primary T cells using anti-S1P<sub>1</sub> (#218713) antibody. Gray histograms represent staining with IgG control antibody. Representative histograms of six independent experiments are shown.
